# Supplementary material for: Glycerol group substituted bis(2-pyridylimino)isoindoline (BPI) complexes: synthesis, characterization and investigation of their biological properties
Source: Royal Society of Chemistry journal article supplement (doi:10.1039/d3dt01481a), 2023-01-01
Supplement: d3dt01481a1.pdf [file d3dt01481a1.pdf]

## Electronic Supplementary Information (ESI)

### Glycerol group substituted bis(2-pyridylimino)isoindoline (BPI) complexes: Synthesis, characterization and investigation of their biological properties

Aseña Kaşıkçı,<sup>a</sup> Ramazan Katırcı,<sup>b</sup> Sadin Özdemir,<sup>c</sup> M. Serkan Yalçın,<sup>d</sup> and Mukaddes Özçeşmeci<sup>a\*</sup>

<sup>a</sup> Istanbul Technical University, Department of Chemistry, 34469, Maslak, Istanbul, Turkey

<sup>b</sup> Sivas University of Science and Technology, Faculty of Engineering and Natural Sciences, 58140 Sivas, Turkey

<sup>c</sup> Mersin University, Food Processing Programme, Technical Science Vocational School, TR-33343 Yenisehir, Mersin, Turkey

<sup>d</sup> Mersin University, Department of Pharmaceutical Microbiology, Faculty of Pharmacy, Turkey, TR-33343 Yenisehir, Mersin, Turkey

## Experimental

### Chemical and Materials

All the reagents and solvents were of reagent-grade quality obtained from commercial suppliers. 4-[(2,2-dimethyl-1,3-dioxolan-4-yl)methoxy]phthalonitrile was prepared as given in the literature [1]. All solvents were dried and purified, as described by Perrin and Armarego [2]. The homogeneity of the products was tested in each step by TLC (silica gel).

### Instruments

<sup>1</sup>H NMR spectra were recorded on an Agilent 500 MHz spectrometer using TMS as the internal reference. <sup>13</sup>C NMR spectrum was recorded on an Agilent 126 MHz NMR. IR spectra were recorded on a Perkin-Elmer Spectrum One FT-IR (ATR sampling accessory) spectrophotometer. Electronic spectra were recorded on a Scinco LabProPlus UV/vis spectrophotometer. Mass spectra were performed on Agilent 6530 QTOF-LC-MS mass spectrometer. Elemental analyses were performed on LECO, CHNS-932 elemental analyzer.

### References

- [1] M. Kimura, T. Kuroda, K. Ohta, K. Hanabusa, H. Shirai, N. Kobayashi, *Langmuir*, 2003, **19**, 4825.
- [2] D.D. Perrin, W.L.F. Armarego, *Purification of Laboratory Chemicals* (2nd ed.), Pergamon Press: Oxford, 1989.

SUPPLEMENTARY FIGURES

NMR spectra of 1a,b and 2a,b

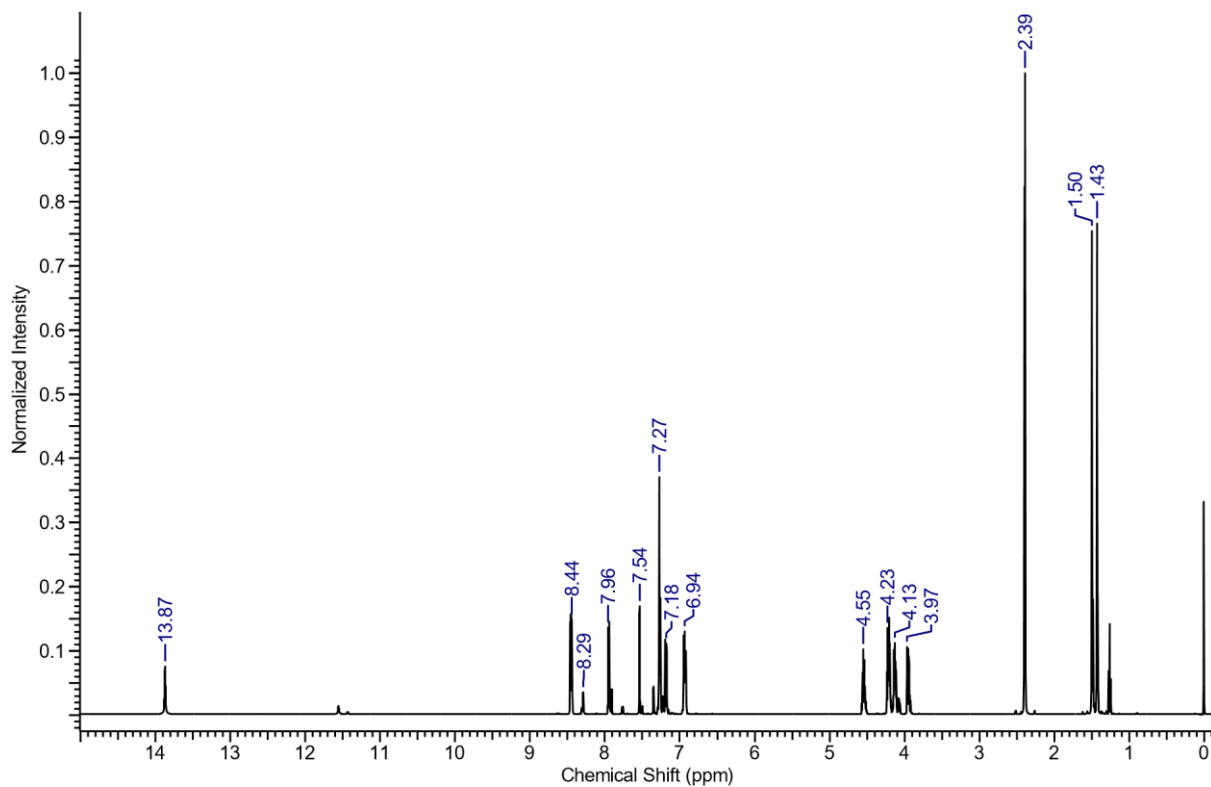

Figure S1:  $^1\text{H}$  NMR spectrum of **1a** in  $\text{CDCl}_3$ .

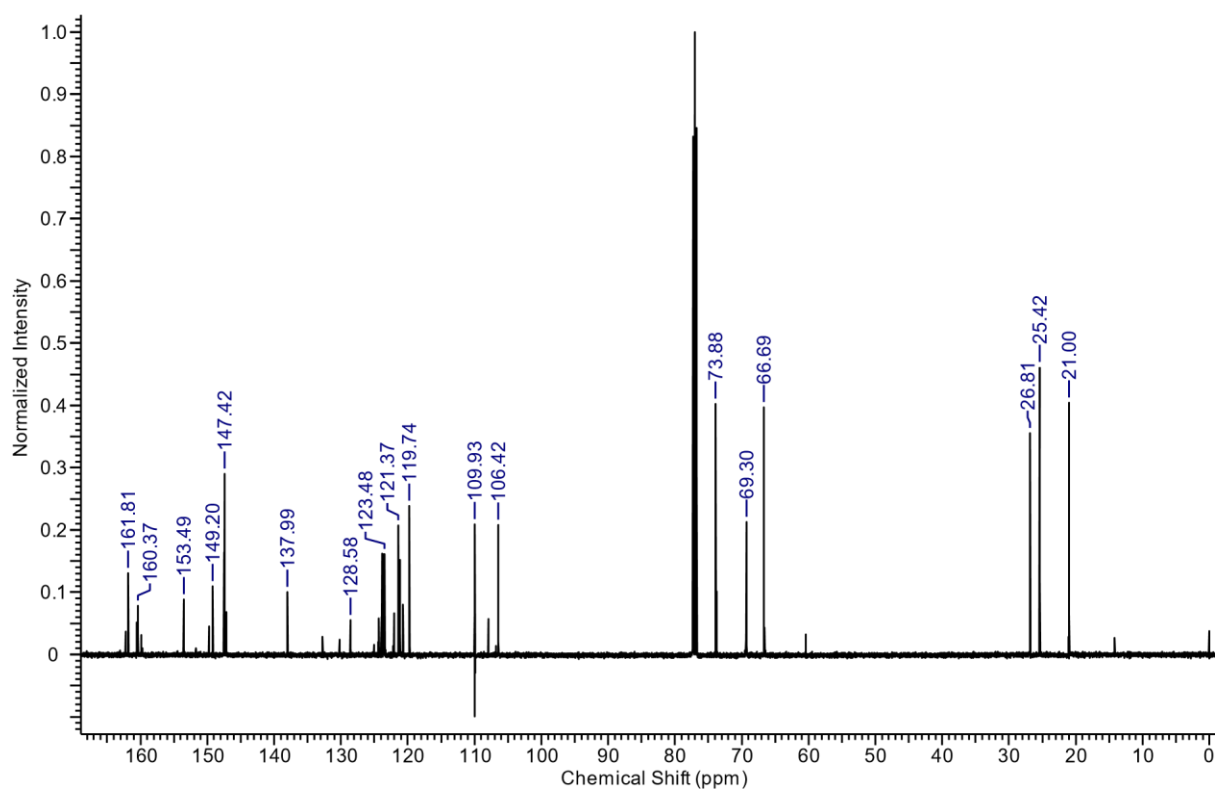

Figure S2:  $^{13}\text{C}$  NMR spectrum of **1a** in  $\text{CDCl}_3$ .

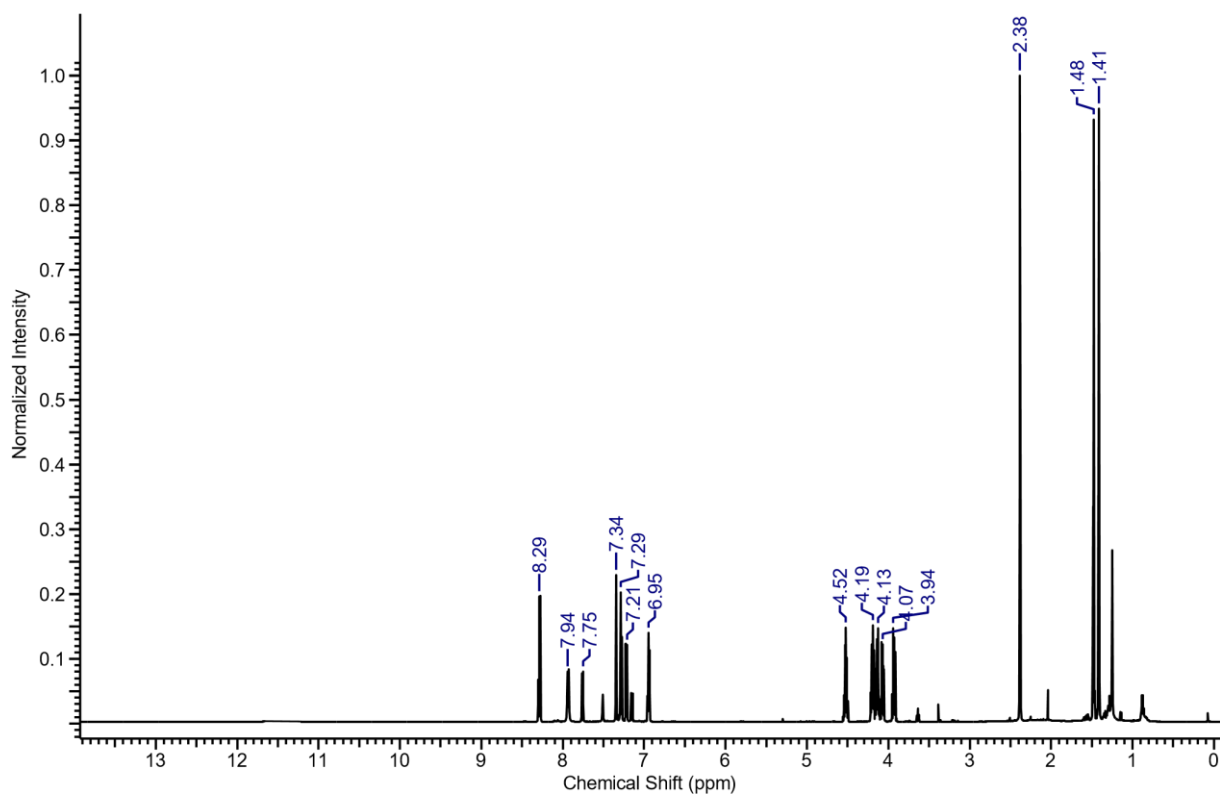

Figure S3:  $^1\text{H}$  NMR spectrum of **2a** in  $\text{CDCl}_3$ .

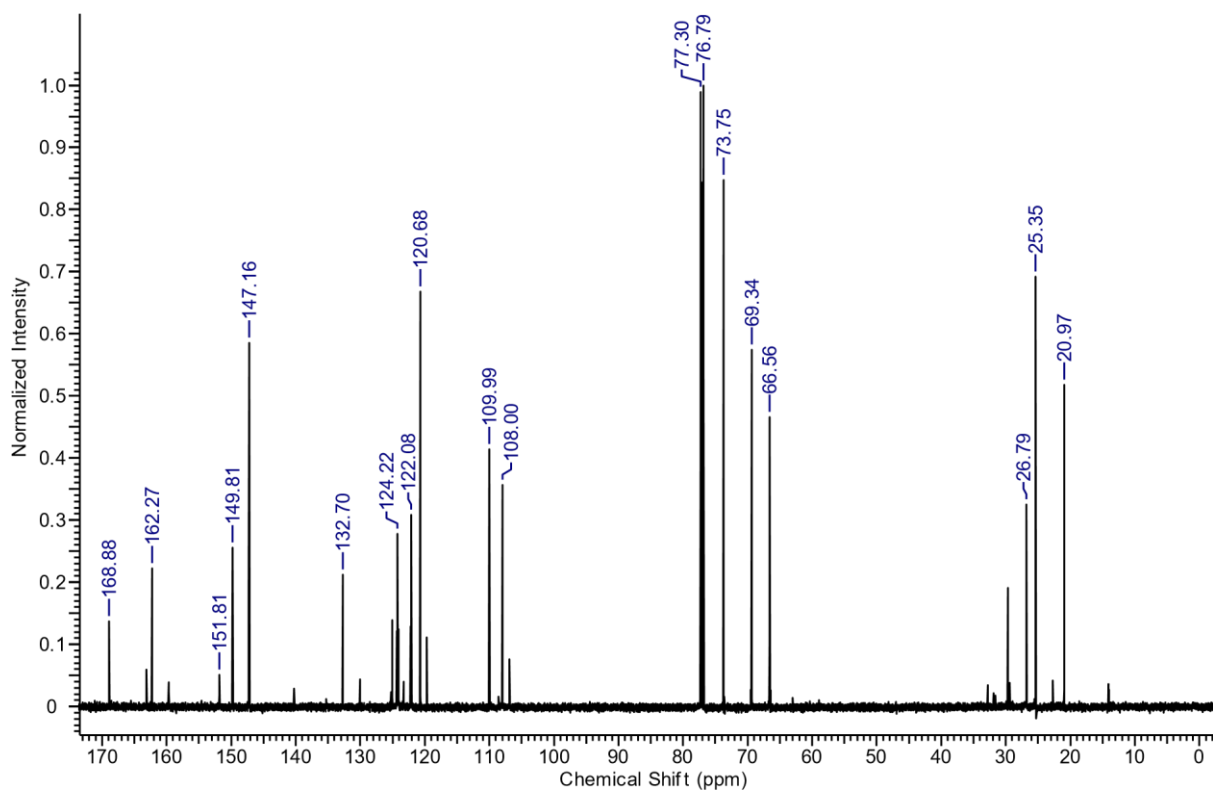

Figure S4:  $^{13}\text{C}$  NMR spectrum of **2a** in  $\text{CDCl}_3$ .

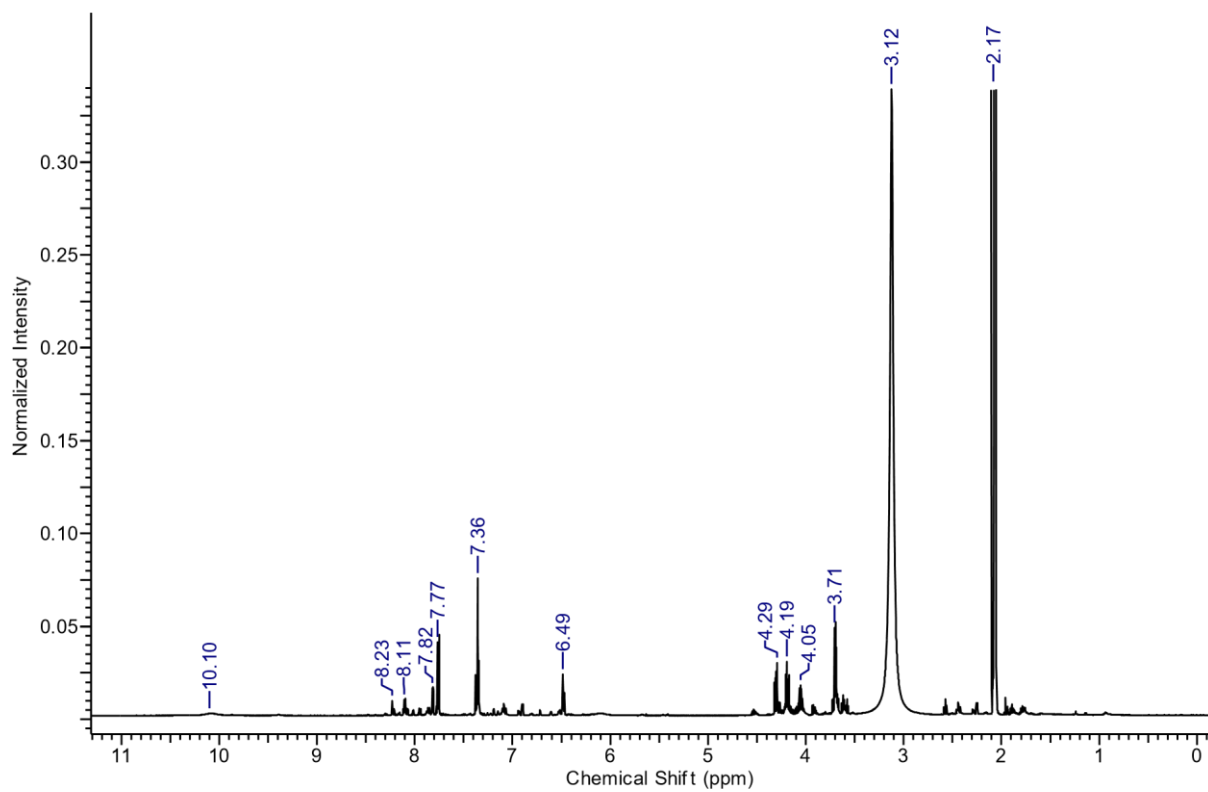

Figure S5:  $^1\text{H}$  NMR spectrum of **1b** in  $\text{d}_6$ -acetone.

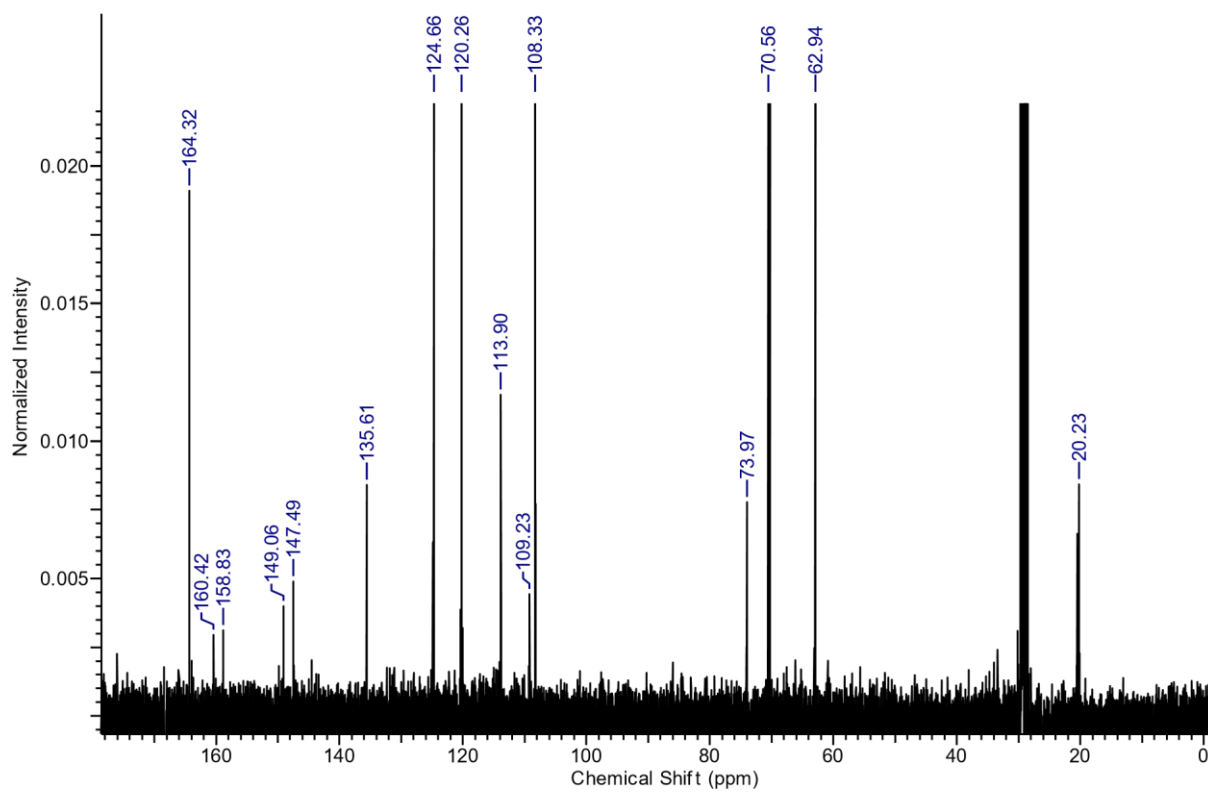

Figure S6:  $^{13}\text{C}$  NMR spectrum of **1b** in  $\text{d}_6$ -acetone.

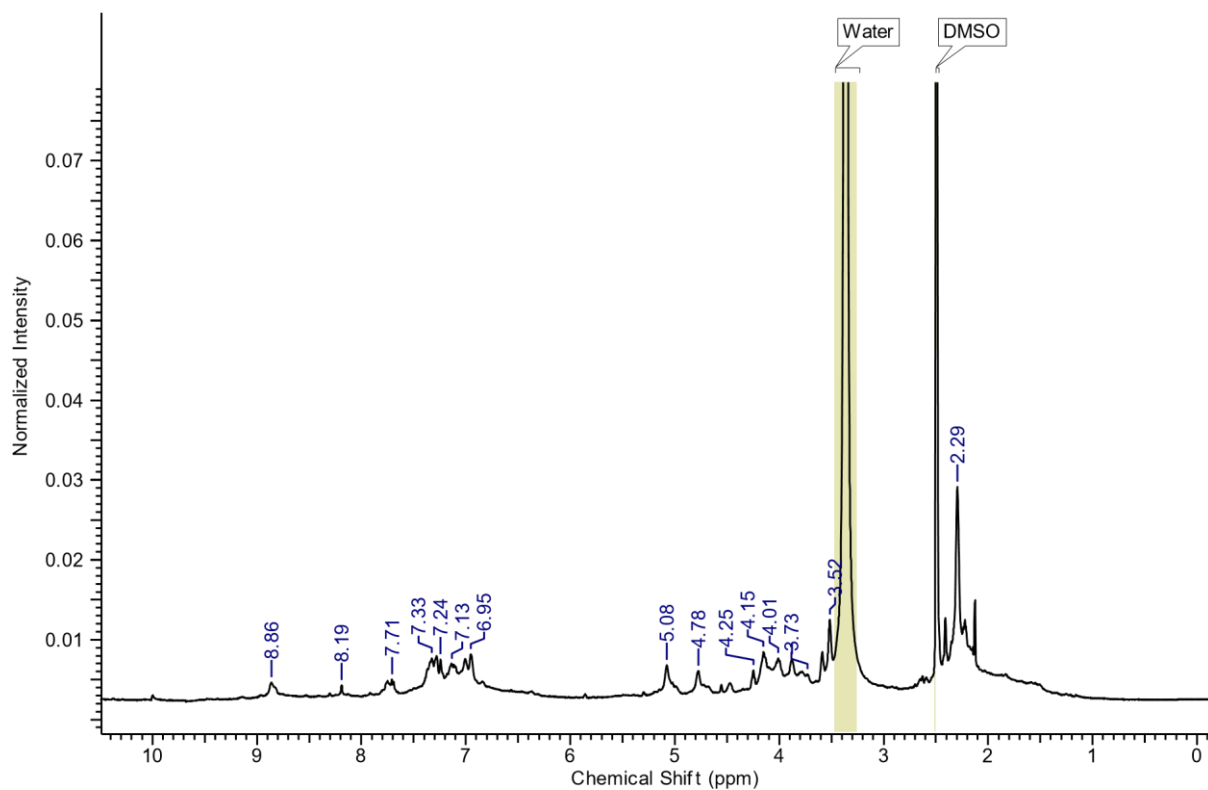

Figure S7:  $^1\text{H}$  NMR spectrum of **2b** in  $\text{d}_6$ -DMSO.

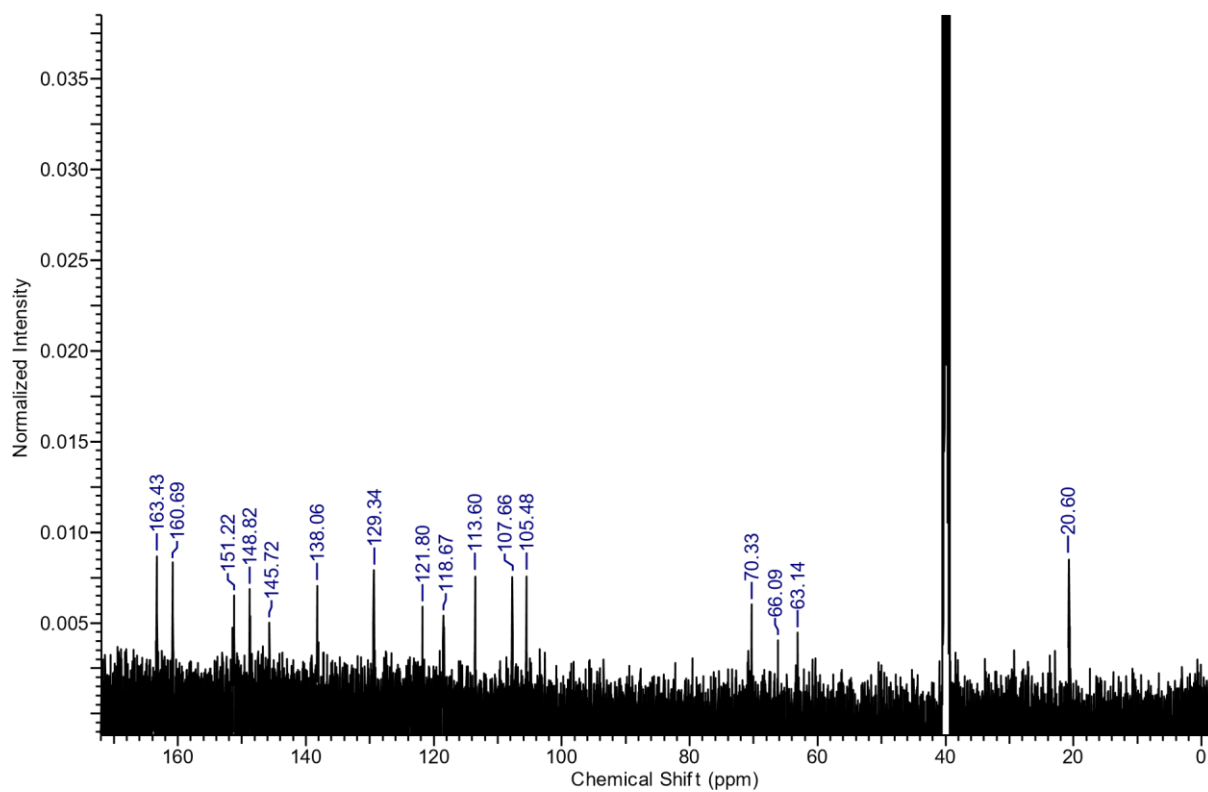

Figure S8:  $^{13}\text{C}$  NMR spectrum of **2b** in  $\text{d}_6$ -DMSO.

MS spectra of BPI compounds

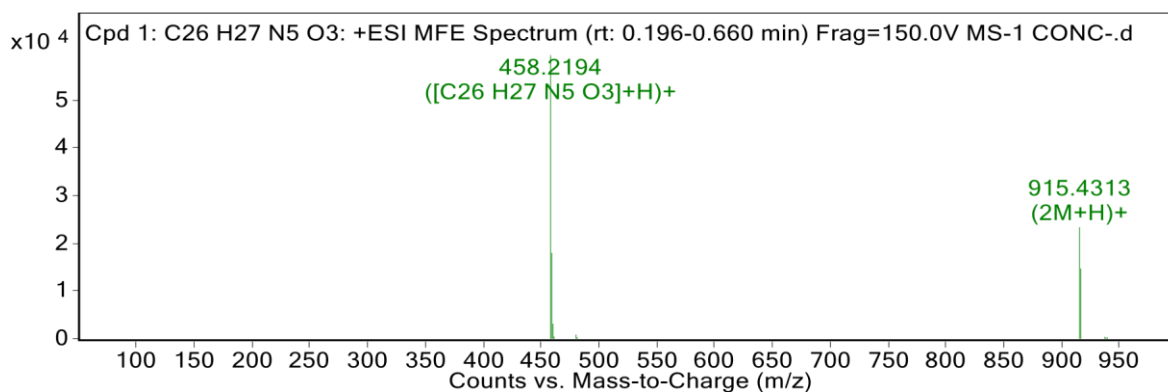

Figure S9: ESI MS spectrum of 1a.

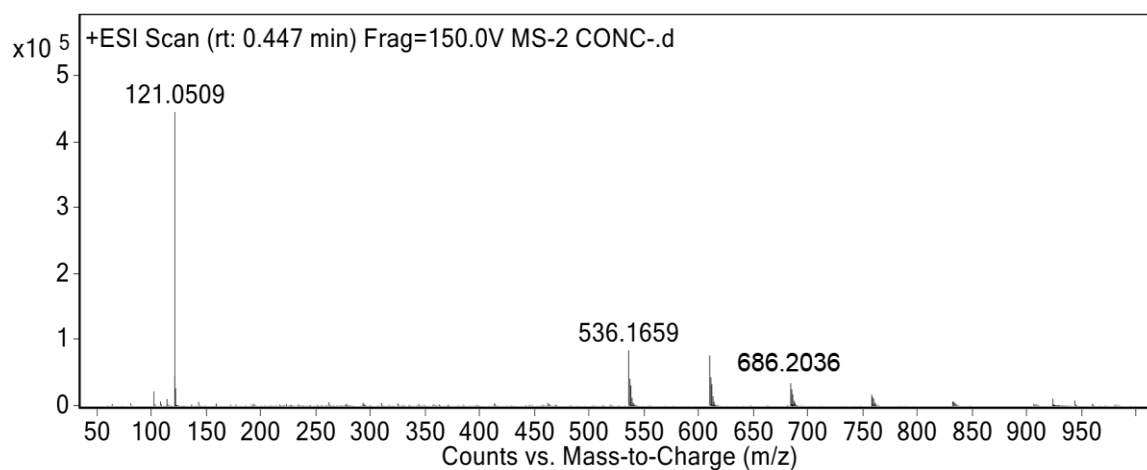

Figure S10: ESI MS spectrum of 2a.

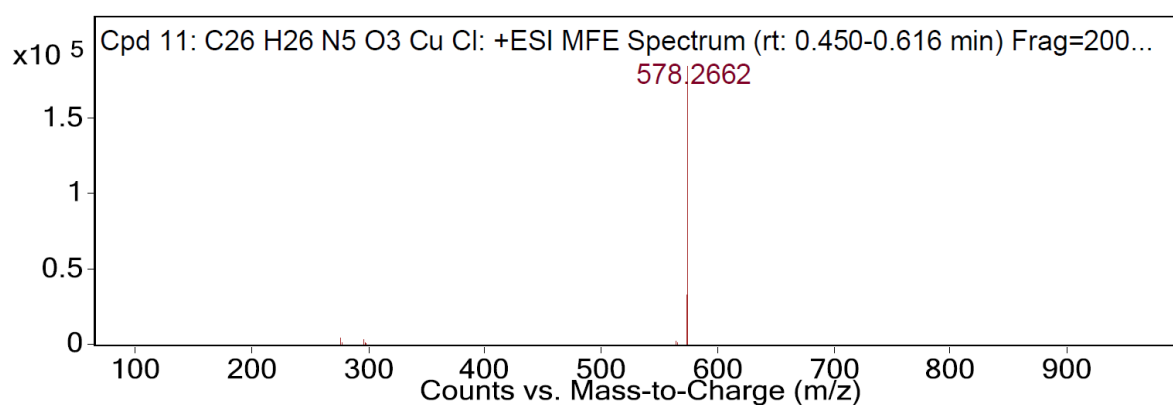

Figure S11: ESI MS spectrum of 3a.

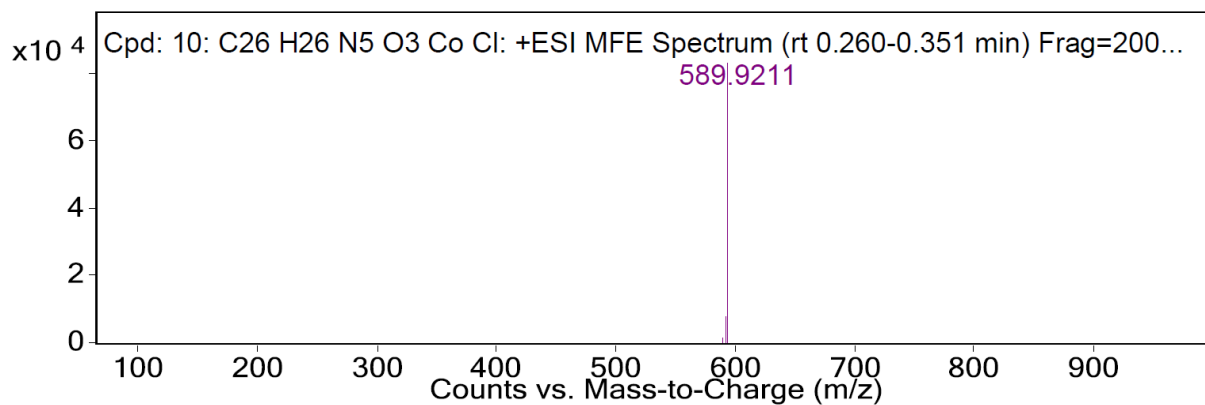

Figure S12: ESI MS spectrum of 4a.

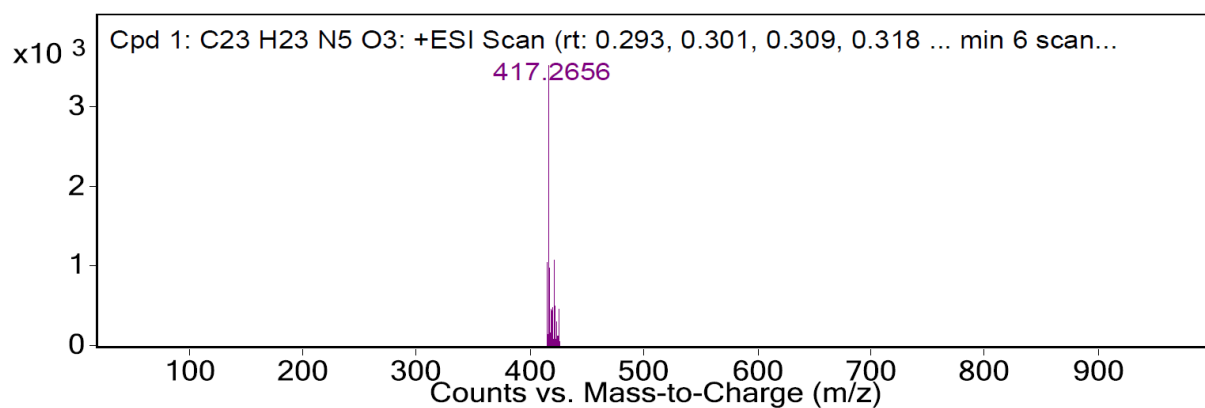

Figure S13: ESI MS spectrum of 1b.

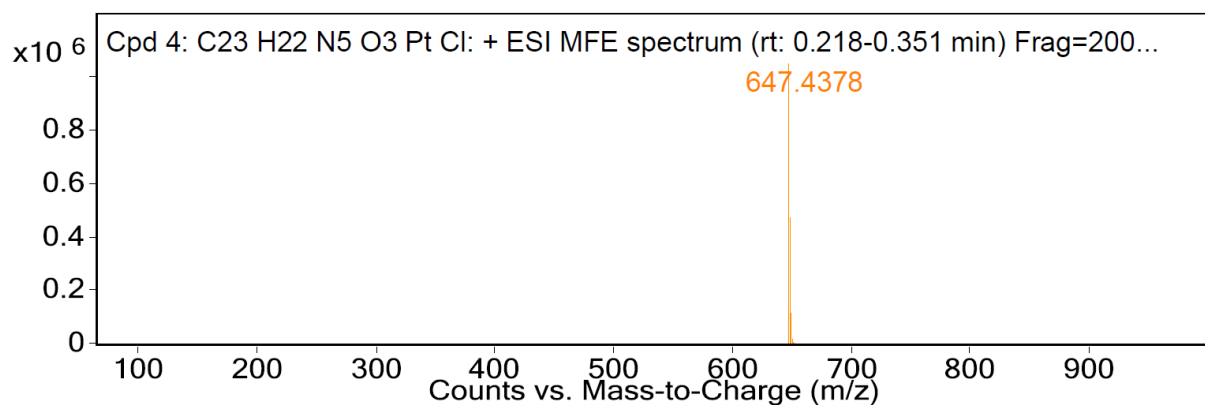

Figure S14: ESI MS spectrum of 2b.

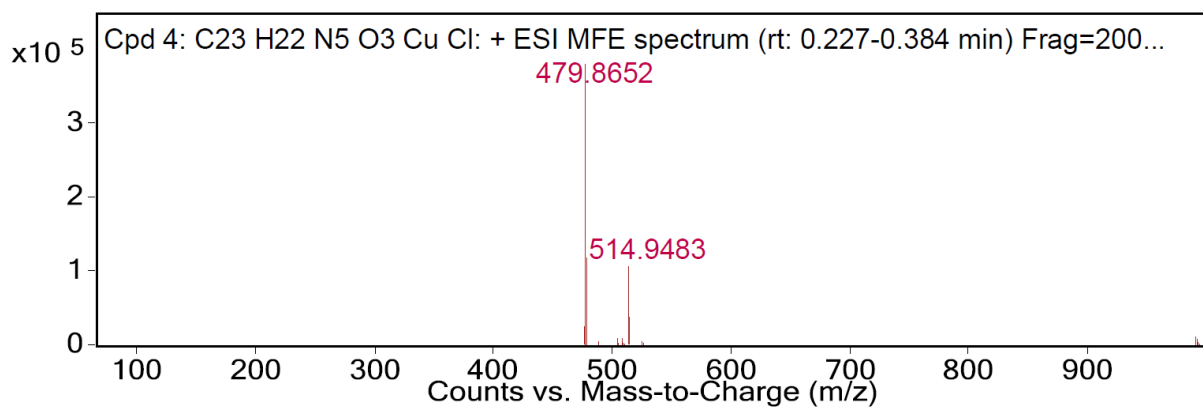

Figure S15: ESI MS spectrum of 3b.

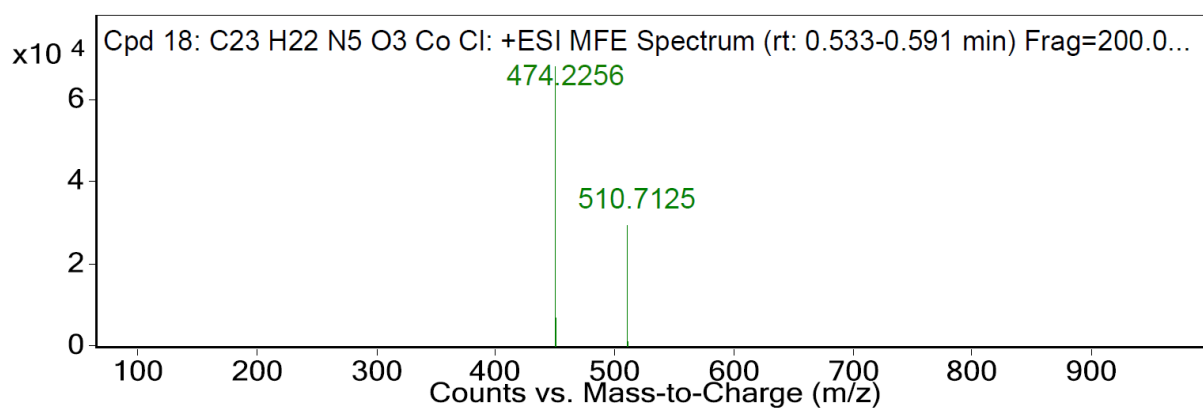

Figure S16: ESI MS spectrum of 4b.

FT IR spectra of BPI compounds

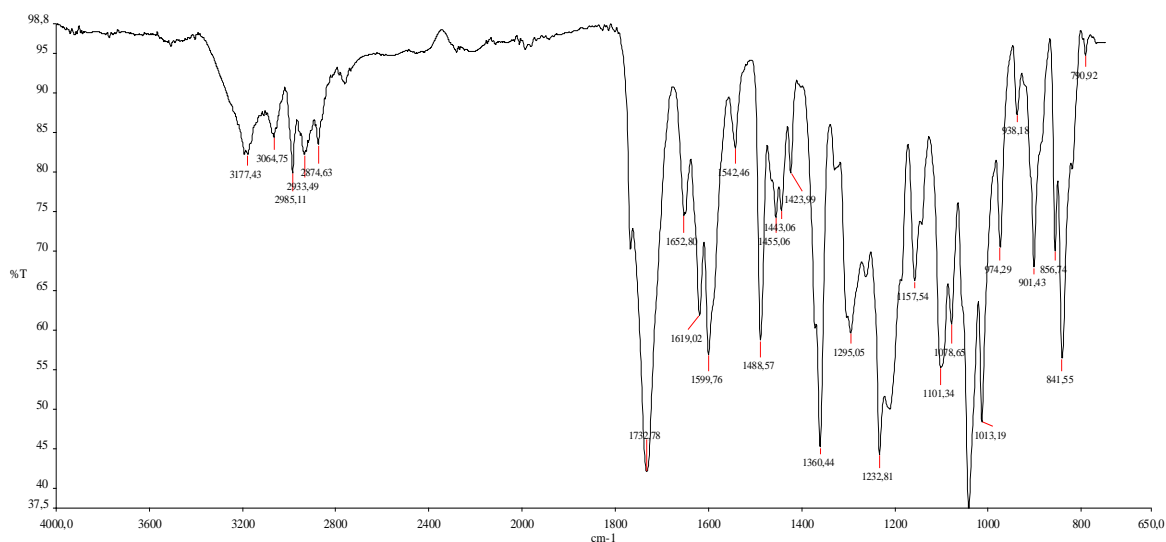

Figure S17: FT IR spectrum of 1a.



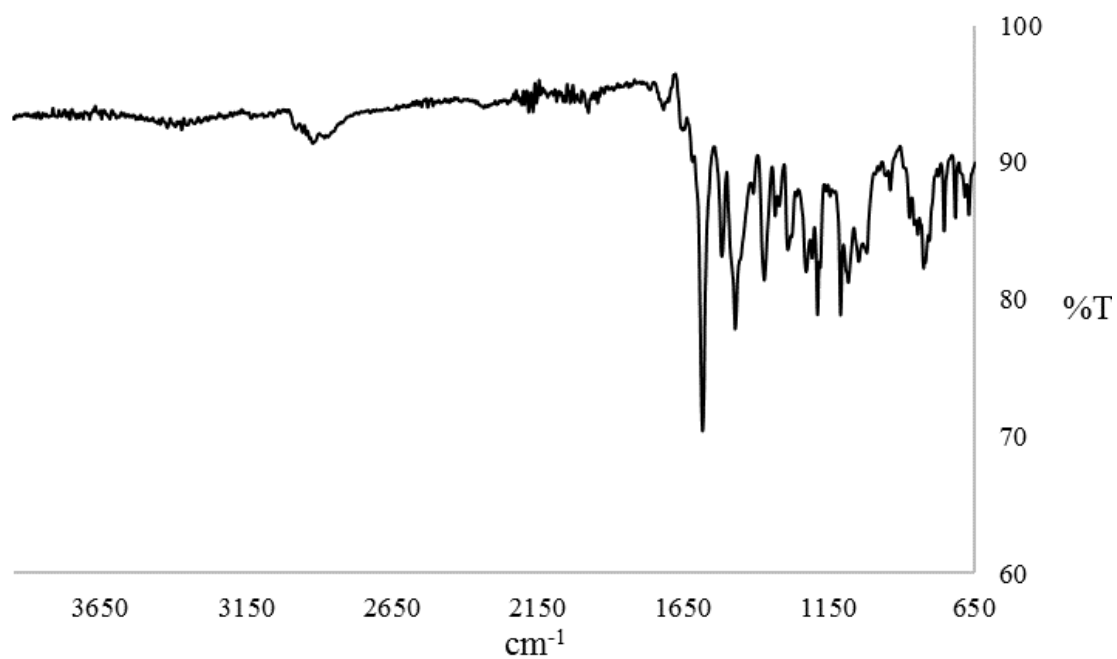

**Figure S18:** FT IR spectrum of **2a**.

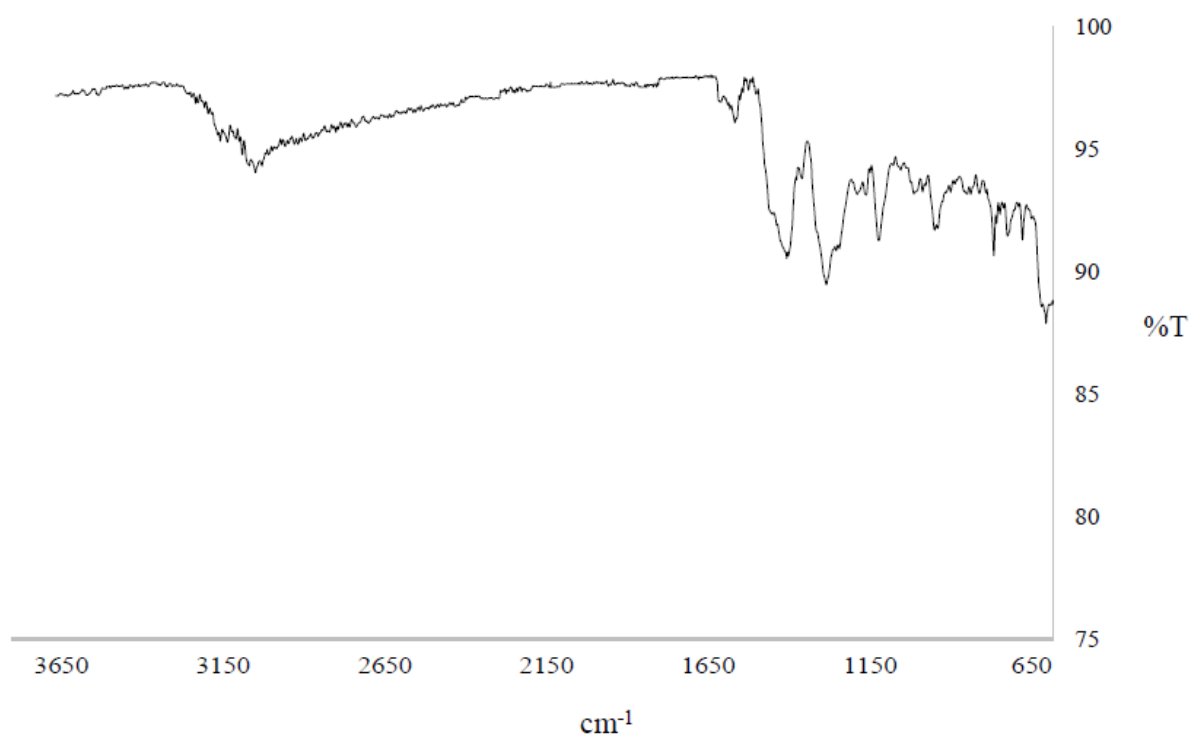

**Figure S19:** FT IR spectrum of **3a**.

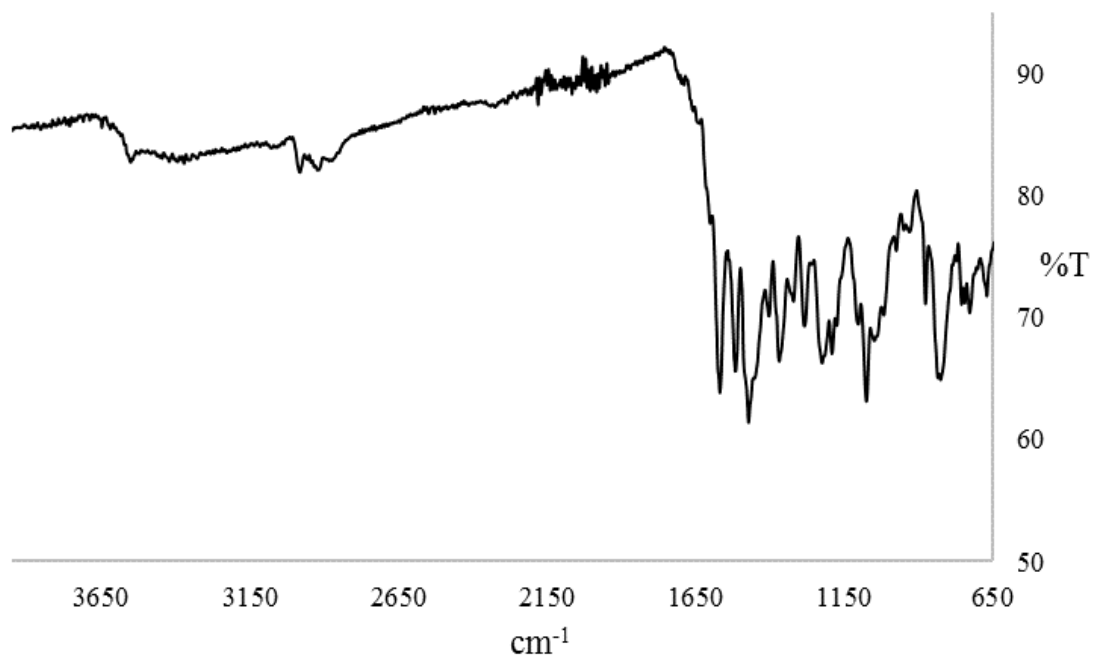

Figure S20: FT IR spectrum of 4a.

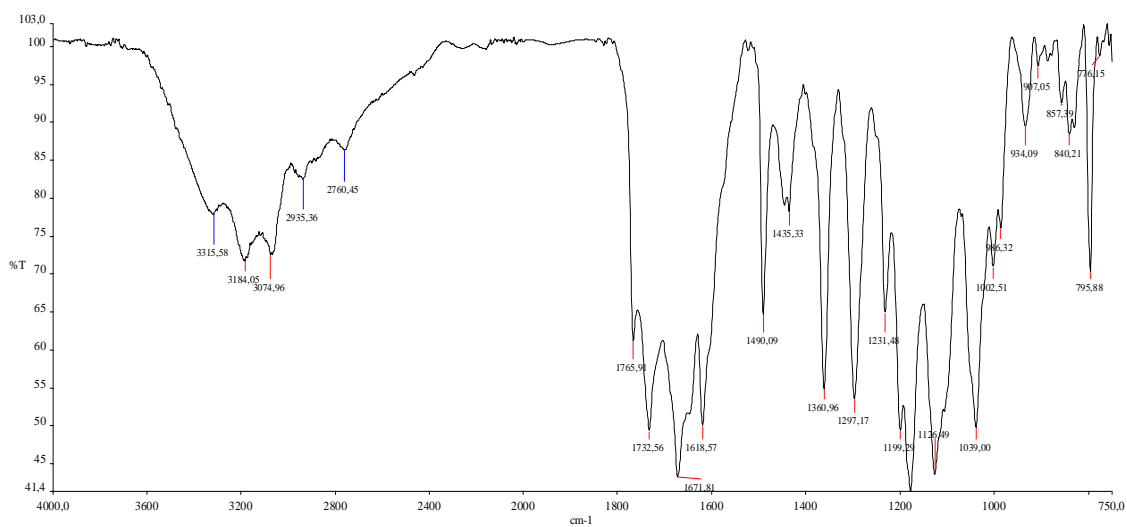

Figure S21: FT IR spectrum of 1b.

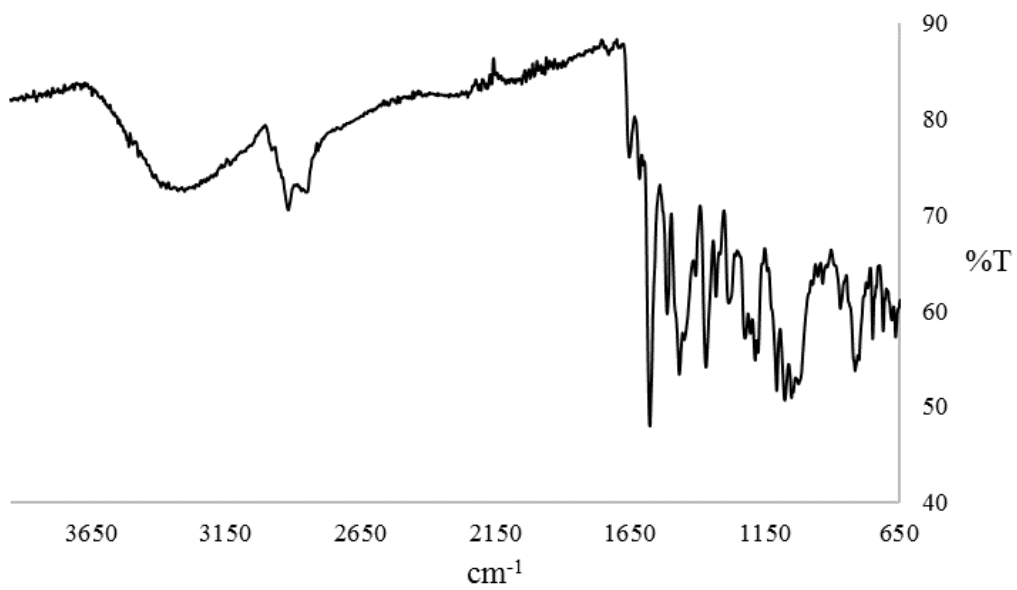

**Figure S22:** FT IR spectrum of **2b**.

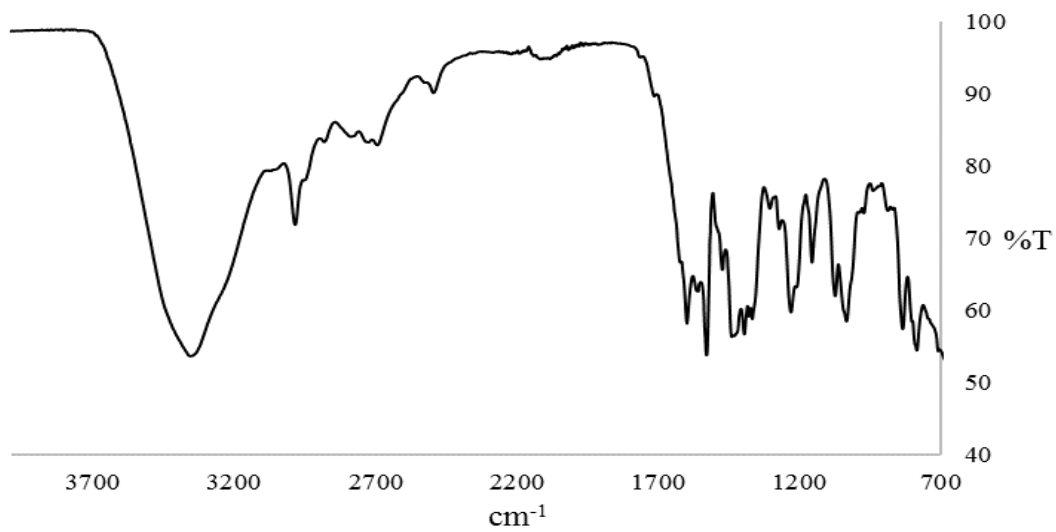

**Figure S23:** FT IR spectrum of **3b**.

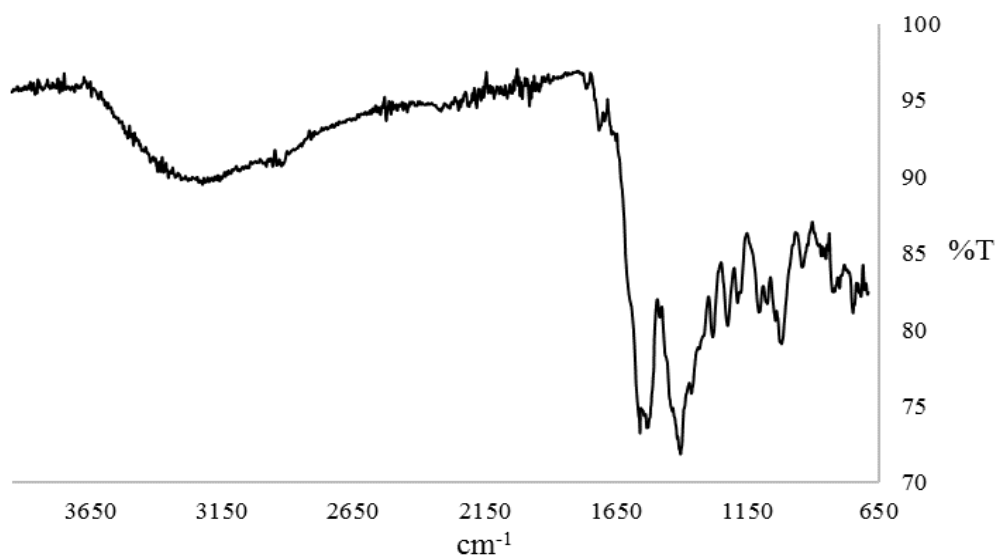

**Figure S24:** FT IR spectrum of **4b**.
